# Supplementary material for: Dopamine sensing by fluorescent carbon nanoparticles synthesized using artichoke extract
Source: Royal Society of Chemistry journal article supplement (doi:10.1039/d4tb00651h), 2024-01-01
Supplement: d4tb00651h1.pdf [file d4tb00651h1.pdf]

## **Dopamine sensing by fluorescent carbon nanoparticles synthesized by artichoke extract**

Roberta Puglisi,<sup>1</sup> Laura Maria Mancuso,<sup>1</sup> Rossella Santonocito,<sup>1</sup> Antonino Gulino,<sup>1,2</sup> Valentina Oliveri,<sup>1</sup> Roberta Ruffino,<sup>1</sup> Giovanni Li Destri,<sup>1</sup> Vera Muccilli,<sup>1</sup> Nunzio Cardullo,<sup>1</sup> Nunzio Tuccitto,<sup>1</sup> Andrea Pappalardo,<sup>1,2</sup> Gianfranco Sfuncia,<sup>3</sup> Giuseppe Nicotra,<sup>3</sup> Manuel Petroselli,<sup>4</sup> Francesco Pappalardo,<sup>5</sup> Vincenzo Zaccaria<sup>5</sup> and Giuseppe Trusso Sfrassetto<sup>1,2,\*</sup>

<sup>1</sup> Dipartimento di Scienze Chimiche, University of Catania, Viale A. Doria 6, 95125 Catania, Italy

<sup>2</sup> INSTM Udr of Catania, Catania 95125, Italy

<sup>3</sup> Consiglio Nazionale delle Ricerche, Istituto per la Microelettronica e Microsistemi (CNR-IMM), Strada VIII, n. 5, Zona Industriale, Catania, 1-95121 Italy

<sup>4</sup> *Institute of Chemical Research of Catalonia (ICIQ), Av. Països Catalans 16, Tarragona, 43007, Spain*

<sup>5</sup> R&D Department, Bionap S.r.l., 95032 Belpasso, CT, Italy

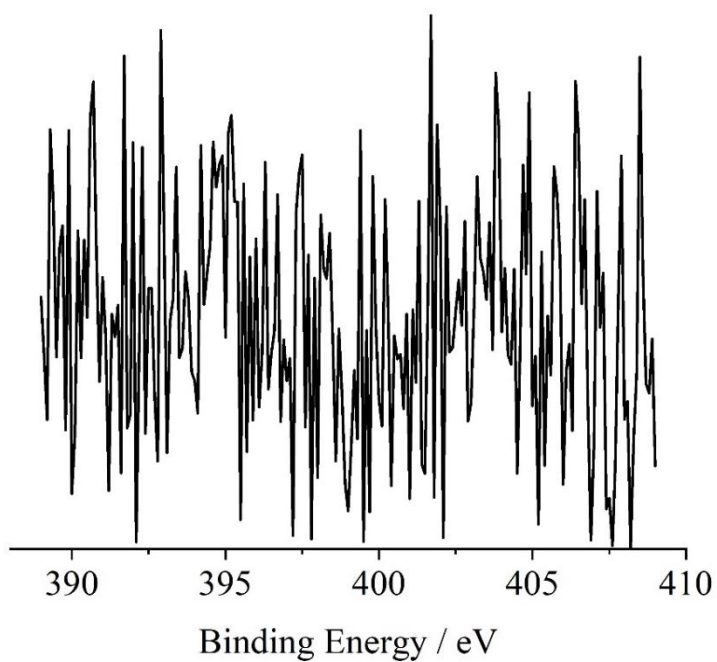

**Figure S1.** Al K $\alpha$  excited XPS of the CNPs in the N 1s binding energy region.

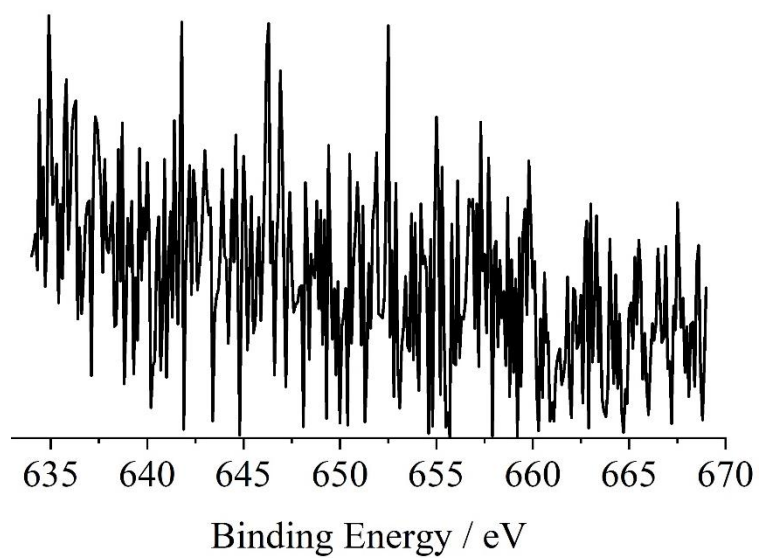

**Figure S2.** Al K $\alpha$  excited XPS of the CNPs in the Mn 2p binding energy region.

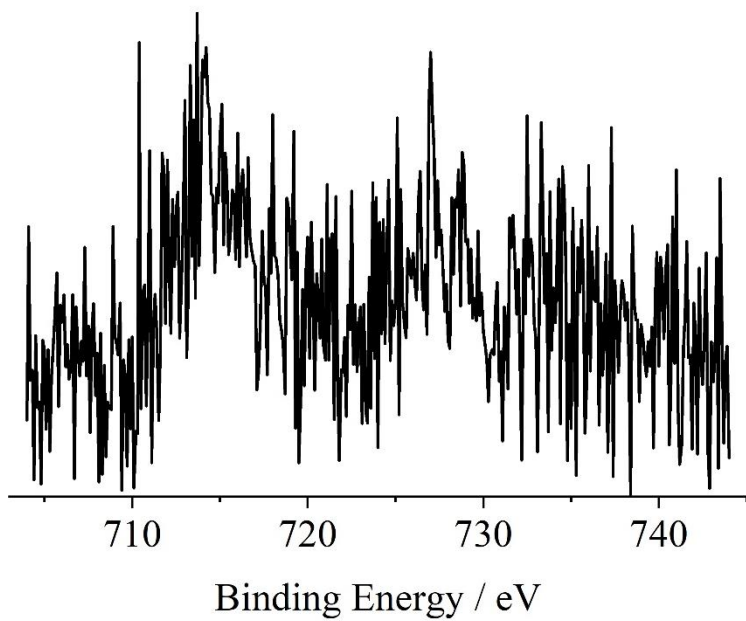

**Figure S3.** Al K $\alpha$  excited XPS of the CNPs in the Fe 2p binding energy region.

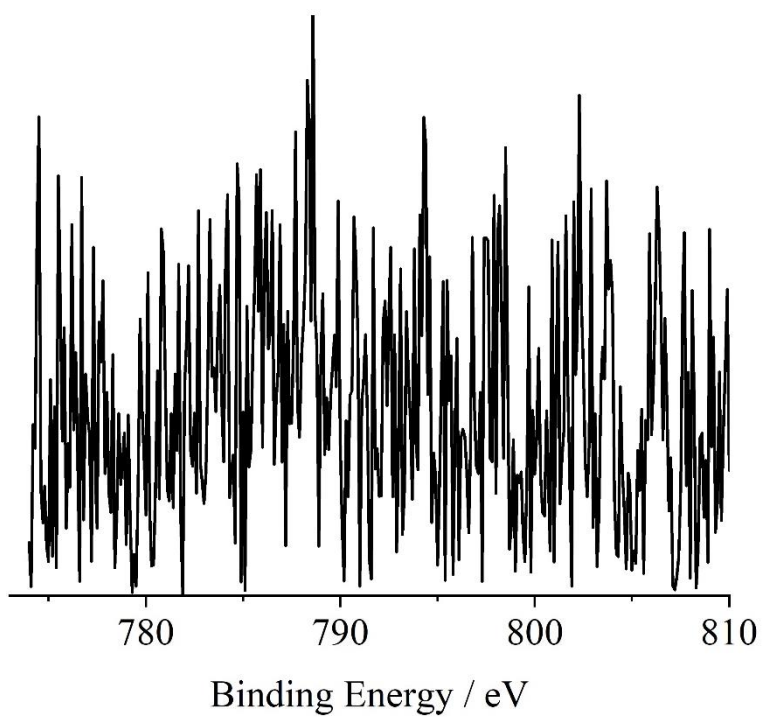

**Figure S4.** Al K $\alpha$  excited XPS of the CNPs in the Co 2p binding energy region.

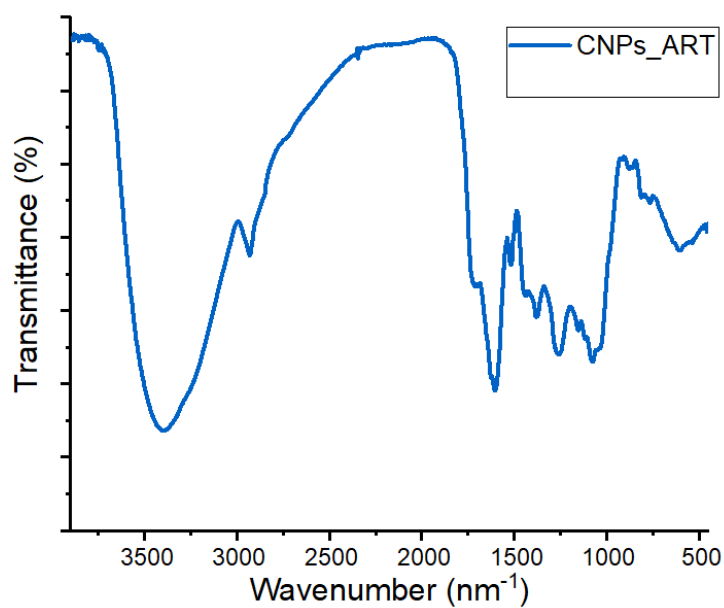

**Figure S5.** FT-IR spectrum of CNPs\_ART

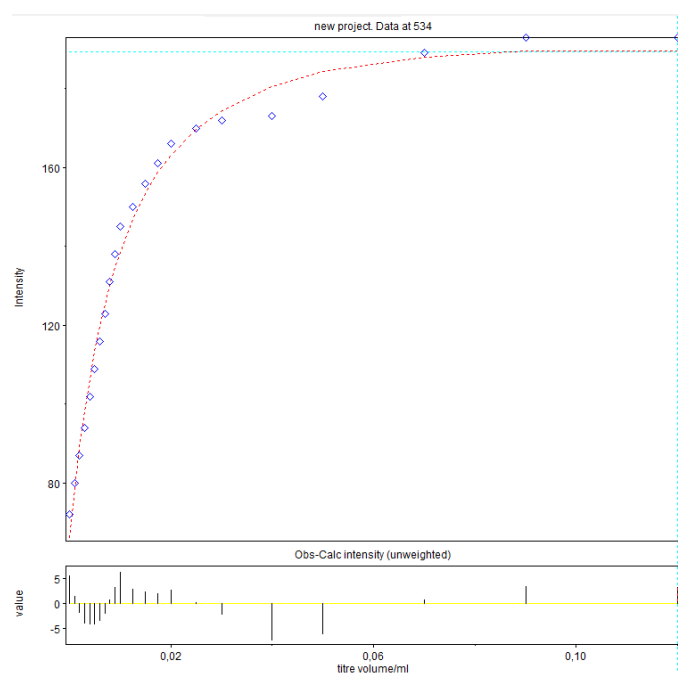

Converged in 1 iteration with sigma = 6,2468

| Log beta | value  | standard deviation |
|----------|--------|--------------------|
| AB       | 5.7639 | 0.0238             |

**Figure S6** HypSpec output of the Fulorescence titration data of CNPs\_ART (0.05mg/mL in MilliQ water) upon progressive addition of DA (0-12 $\mu$ M).

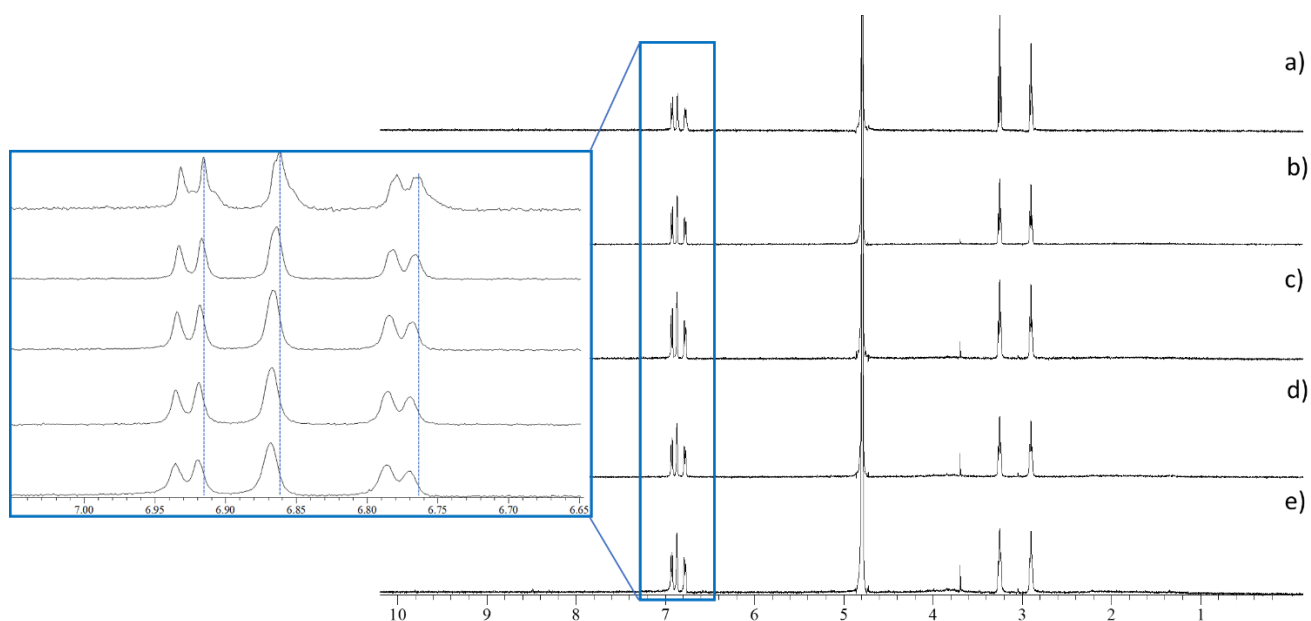

**Figure S7.**  $^1\text{H}$  NMR titration of dopamine: a) DA 1mM in  $\text{D}_2\text{O}$ ; b) DA 1mM in  $\text{D}_2\text{O}$  + CNPs\_ART 0.0625mg/mL; c) DA 1mM in  $\text{D}_2\text{O}$  + CNPs\_ART 0.125mg/mL; d) DA 1mM in  $\text{D}_2\text{O}$  + CNPs\_ART 0.187mg/mL; e) DA 1mM in  $\text{D}_2\text{O}$  + CNPs\_ART 0.250mg/mL.

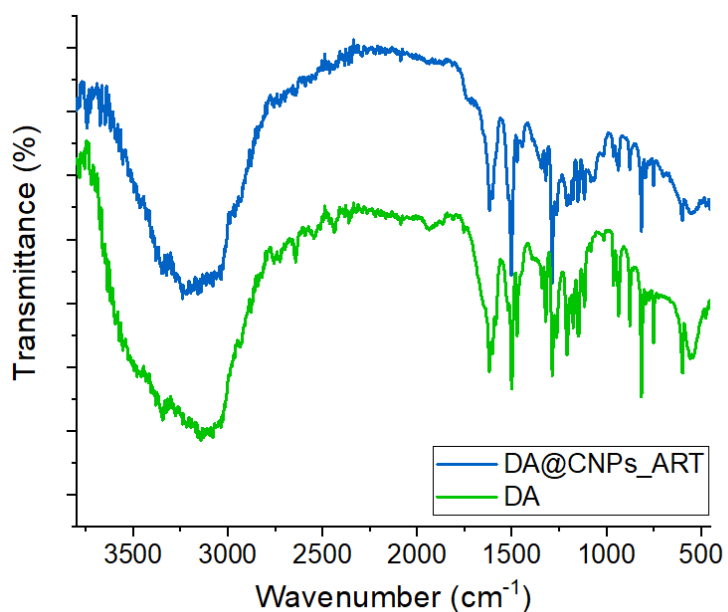

**Figure S8.** FT-IR spectra of DA (green line) and DA@CNPs\_ART (blue line).

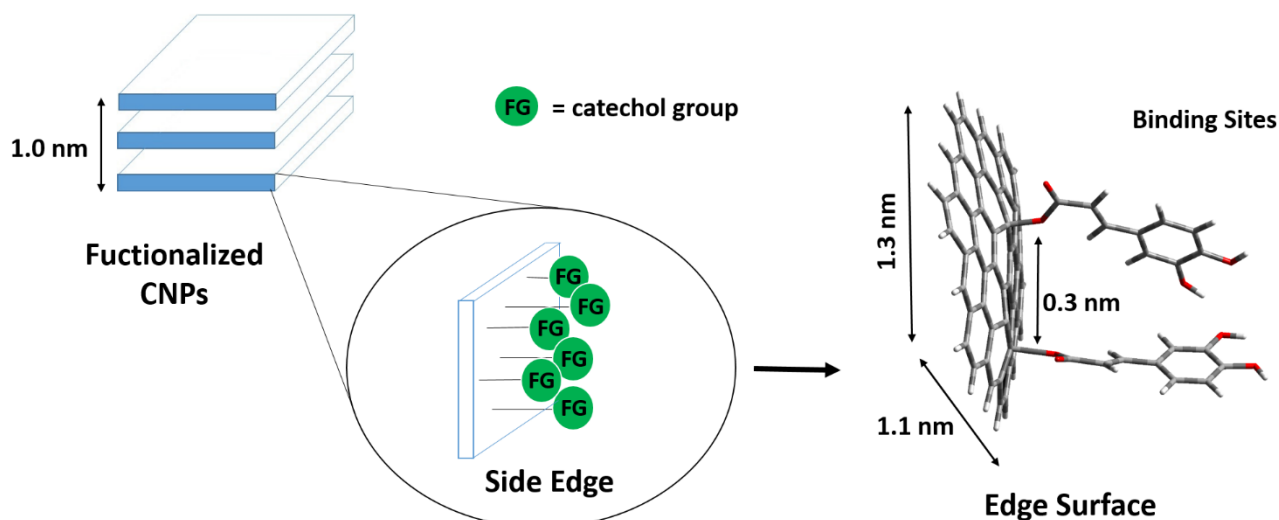

**Figure S9:** Schematic representation of the investigated system (functionalized CNPs with catechol units), taking in account the distances found in the XPS and TEM analyses.

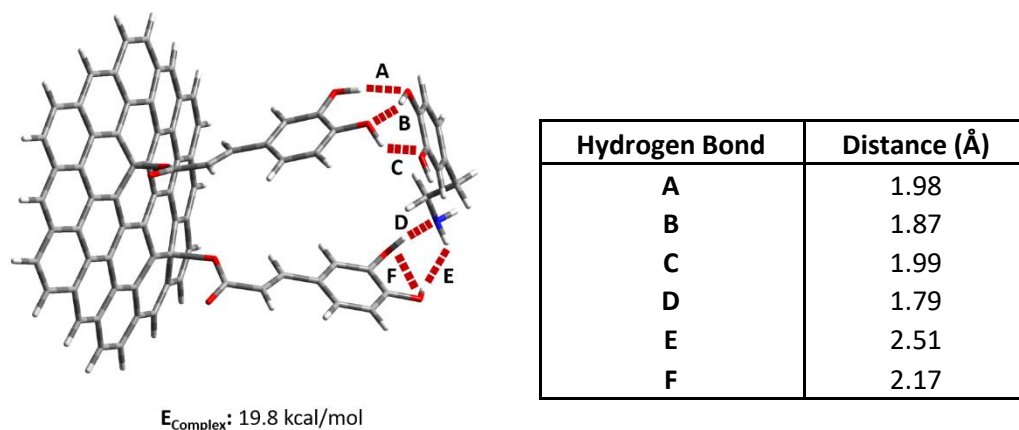

**Figure S10:** Structure of the most stable HG complex between functionalized CNPs and dopamine (DA) calculated at B3LYP/6-31G(d,p) level of theory in gas phase. Hydrogen bonds (A-F) in the host-guest complex are marked in red. Complexation energy ( $E_{\text{complex}}$ ) and HBs length are also reported.

**Table S1:** Complexation energy ( $E_{\text{complex}}$ ) for the HG complex between dopamine and functionalized CNPs calculated at B3LYP/6-31G(d,p) level of theory in gas phase. Complexation energy of a water dimer ( $2\text{H}_2\text{O}$ ) is reported for a better comparison. Energy difference ( $\Delta E$ ) is reported, taking into account the HG complex with dopamine as a reference.

| HG Complex                    | $E_{\text{complex}}$ (kcal/mol) | $\Delta E$ (kcal/mol) |
|-------------------------------|---------------------------------|-----------------------|
| Dopamine@CNPs                 | 19.8                            | -                     |
| $2\text{H}_2\text{O}$ (dimer) | 5.9                             | -13.9                 |

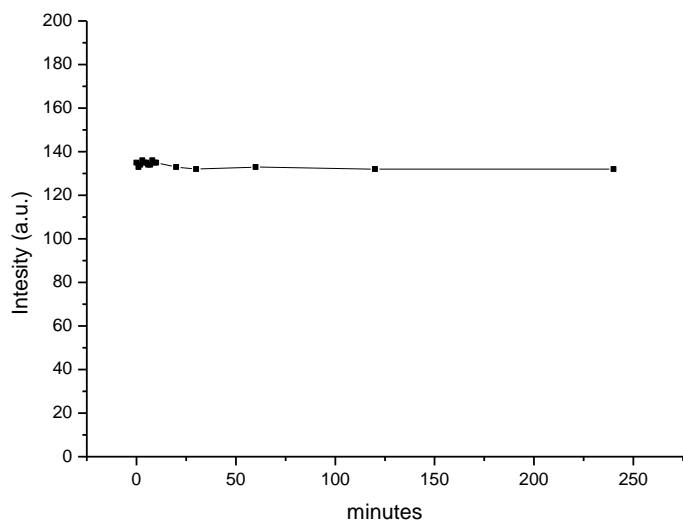

**Figure S11.** Stability test: Fluorescence emission values of CNPs\_ART on solid support at different time (0-240 minutes,  $\lambda_{\text{ex}}$  380 nm,  $\lambda_{\text{em}}$  440 nm).

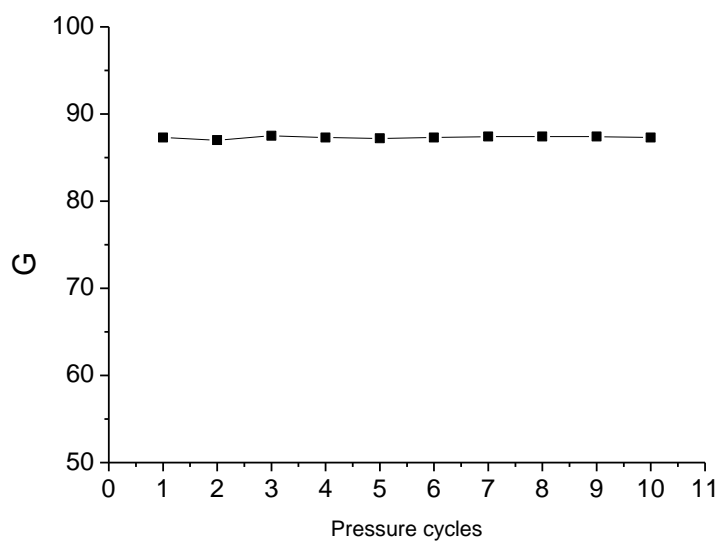

**Figure S12.** Mechanochromic test: G channel values of CNPs\_ART on solid support obtained after progressive exposure of polycellulose filter, simulating the addition of DA.

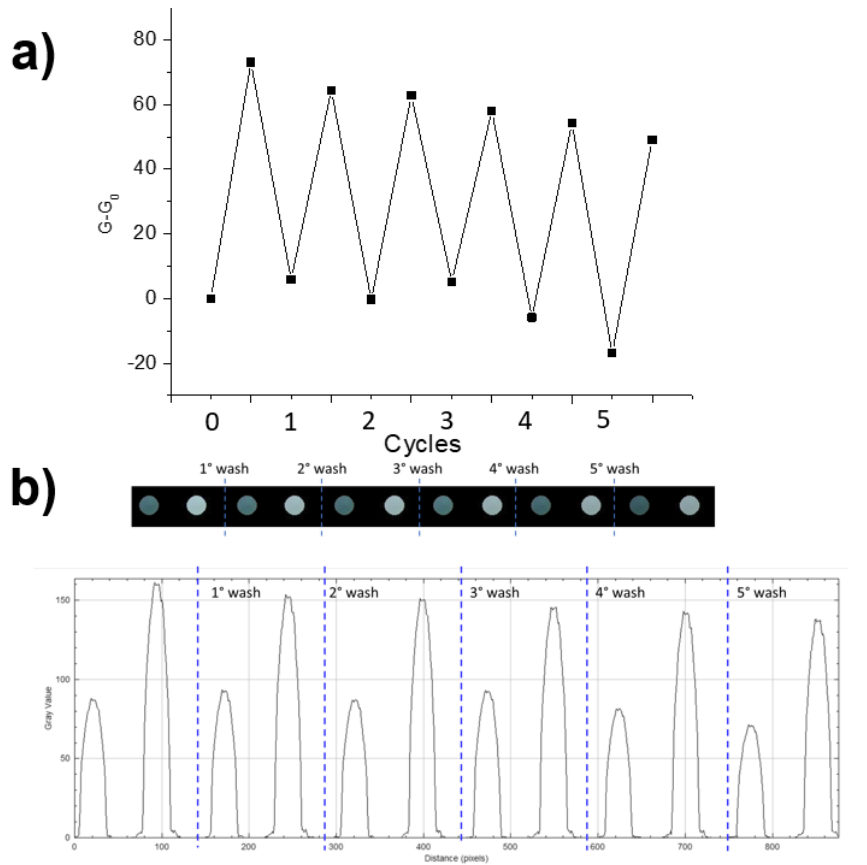

**Figure S13.** Recovery test: a) optical response expressed in normalised grey channel intensity values ( $G$  and  $G_0$  are the Gray channel values after and before the exposure to the analyte, respectively) of CNPs\_ART on solid support after the addition of DA 1 nM followed by washing with chloroform (simple immersion of test strip in a elution camera); b) real images and Fiji output of each cycle.
